# Supplementary material
Source: publisher figshare collection journal article supplement (https://sage.figshare.com/ndownloader/files/17832677)
Supplement: Supplementary file 1 [file 17832677]

|                                    | <b>Correlation coefficient</b> | <b>p-value</b> | <b>Treatment duration in days (median (25<sup>th</sup>-75<sup>th</sup> percentile))<sup>§</sup></b> | <b>n</b> |
|------------------------------------|--------------------------------|----------------|-----------------------------------------------------------------------------------------------------|----------|
| <b>Injectables*</b>                | 0.6                            | 0.29           | 2684 (979-4800)                                                                                     | 5/7      |
| <b>Corticosteroids<sup>+</sup></b> | -0.48                          | 0.14           | 5 (1-8)                                                                                             | 11/16    |
| <b>Rituximab</b>                   | 0.06                           | 0.72           | 233 (115-331)                                                                                       | 41/42    |
| <b>Natalizumab</b>                 | -0.13                          | 0.4            | 731 (365-1248)                                                                                      | 47/48    |
| <b>Dimethyl fumarate</b>           | -0.43                          | 0.34           | 1032 (889-1490)                                                                                     | 7/10     |
| <b>Fingolimod</b>                  | -0.3                           | 0.62           | 1135 (329-1462)                                                                                     | 5/6      |

**Supplementary table: Correlation of treatment duration and immunoglobulin G concentration**

Spearman's Rho correlation was used. <sup>§</sup>: Duration between therapy start and serum immunoglobulin sampling. \*: Injectables: Interferons and glatiramer acetate. <sup>+</sup>: Patients were indexed as having received corticosteroids if administered intravenously  $\leq 4$  weeks before blood sampling.
